# Supplementary material
Source: PubMed Central journal article supplement (PMC3529643)
Supplement: supp_kfs199_toxsci-12-0299-File002.pdf [file supp_kfs199_toxsci-12-0299-File002.pdf]

## Supplementary Figures

sFig. 1. Cell co-culture and migration assay. (A) Schematic illustration of the cell co-culture system used in the cell migration assay. (B & C) Preliminary studies to determine the rate of migration of neighboring cells induced by control cells or by cells treated with 10  $\mu\text{M}$   $\text{As}^{3+}$  for 8 h.
