# Supplementary material
Source: PubMed Central journal article supplement (PMC3529643)

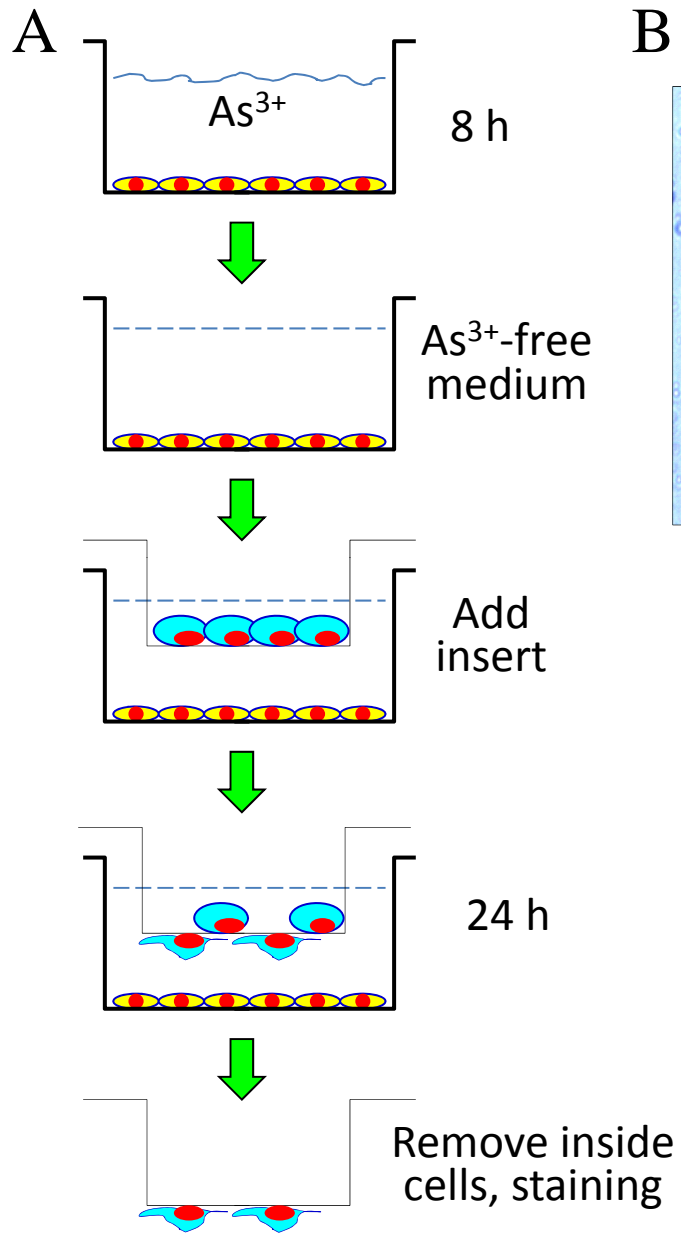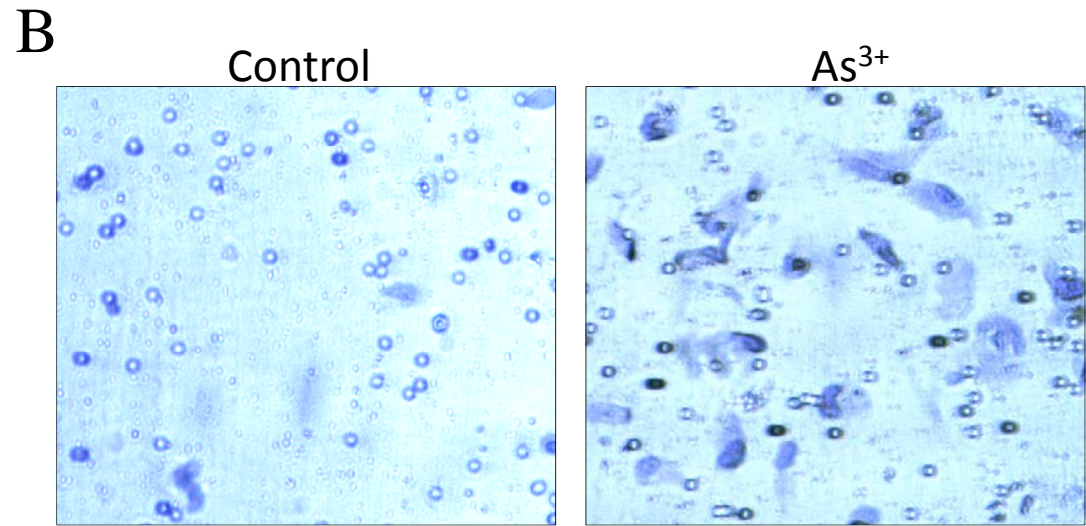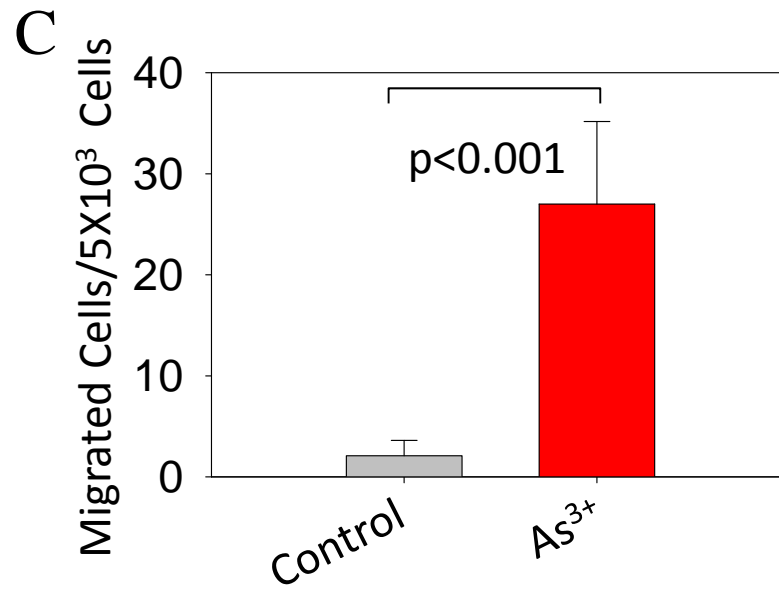

Supplementary Fig. 1

Supplement: supp_kfs199_toxsci-12-0299-File003.pdf [file supp_kfs199_toxsci-12-0299-File003.pdf]
